# Supplementary material
Source: Springer Nature journal article supplement (https://www.springermedizin.de/resource/supplementary/12888_2008_482_MOESM2_ESM.pdf/9483382)

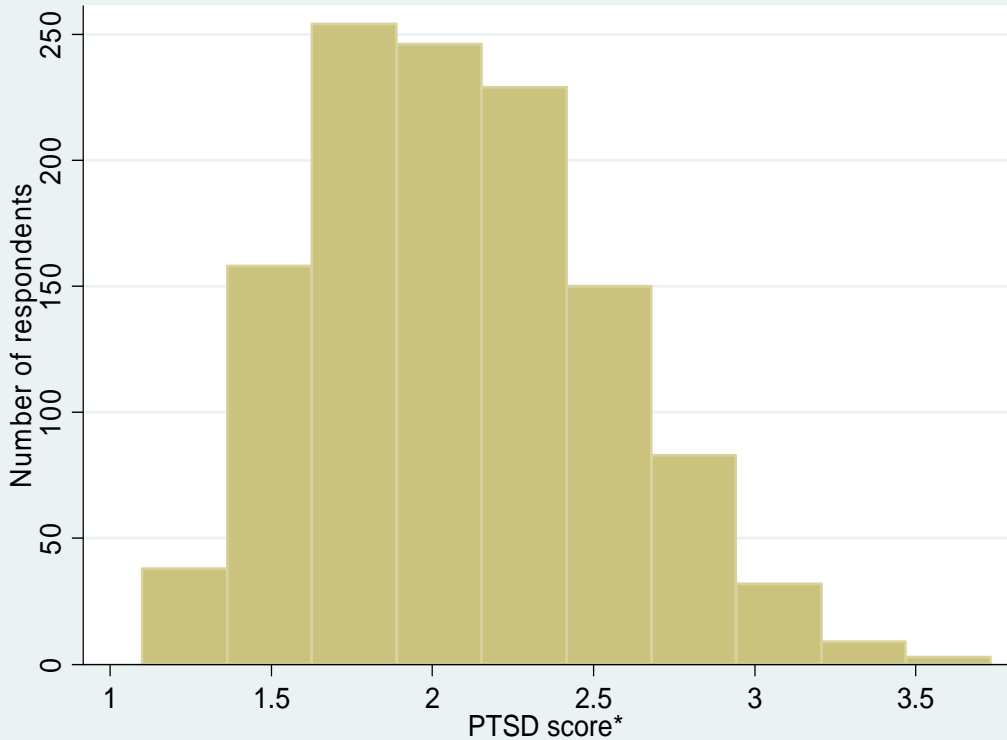

\* PTSD cut off 2.0 or above (HTQ)

Supplement: MOESM2 [file 9483382]
